# Supplementary material
Source: publisher figshare collection journal article supplement (https://plos.figshare.com/articles/dataset/_/5431585)
Supplement: Supplementary file [file 1]

Number of taxa:  $171 + 1$

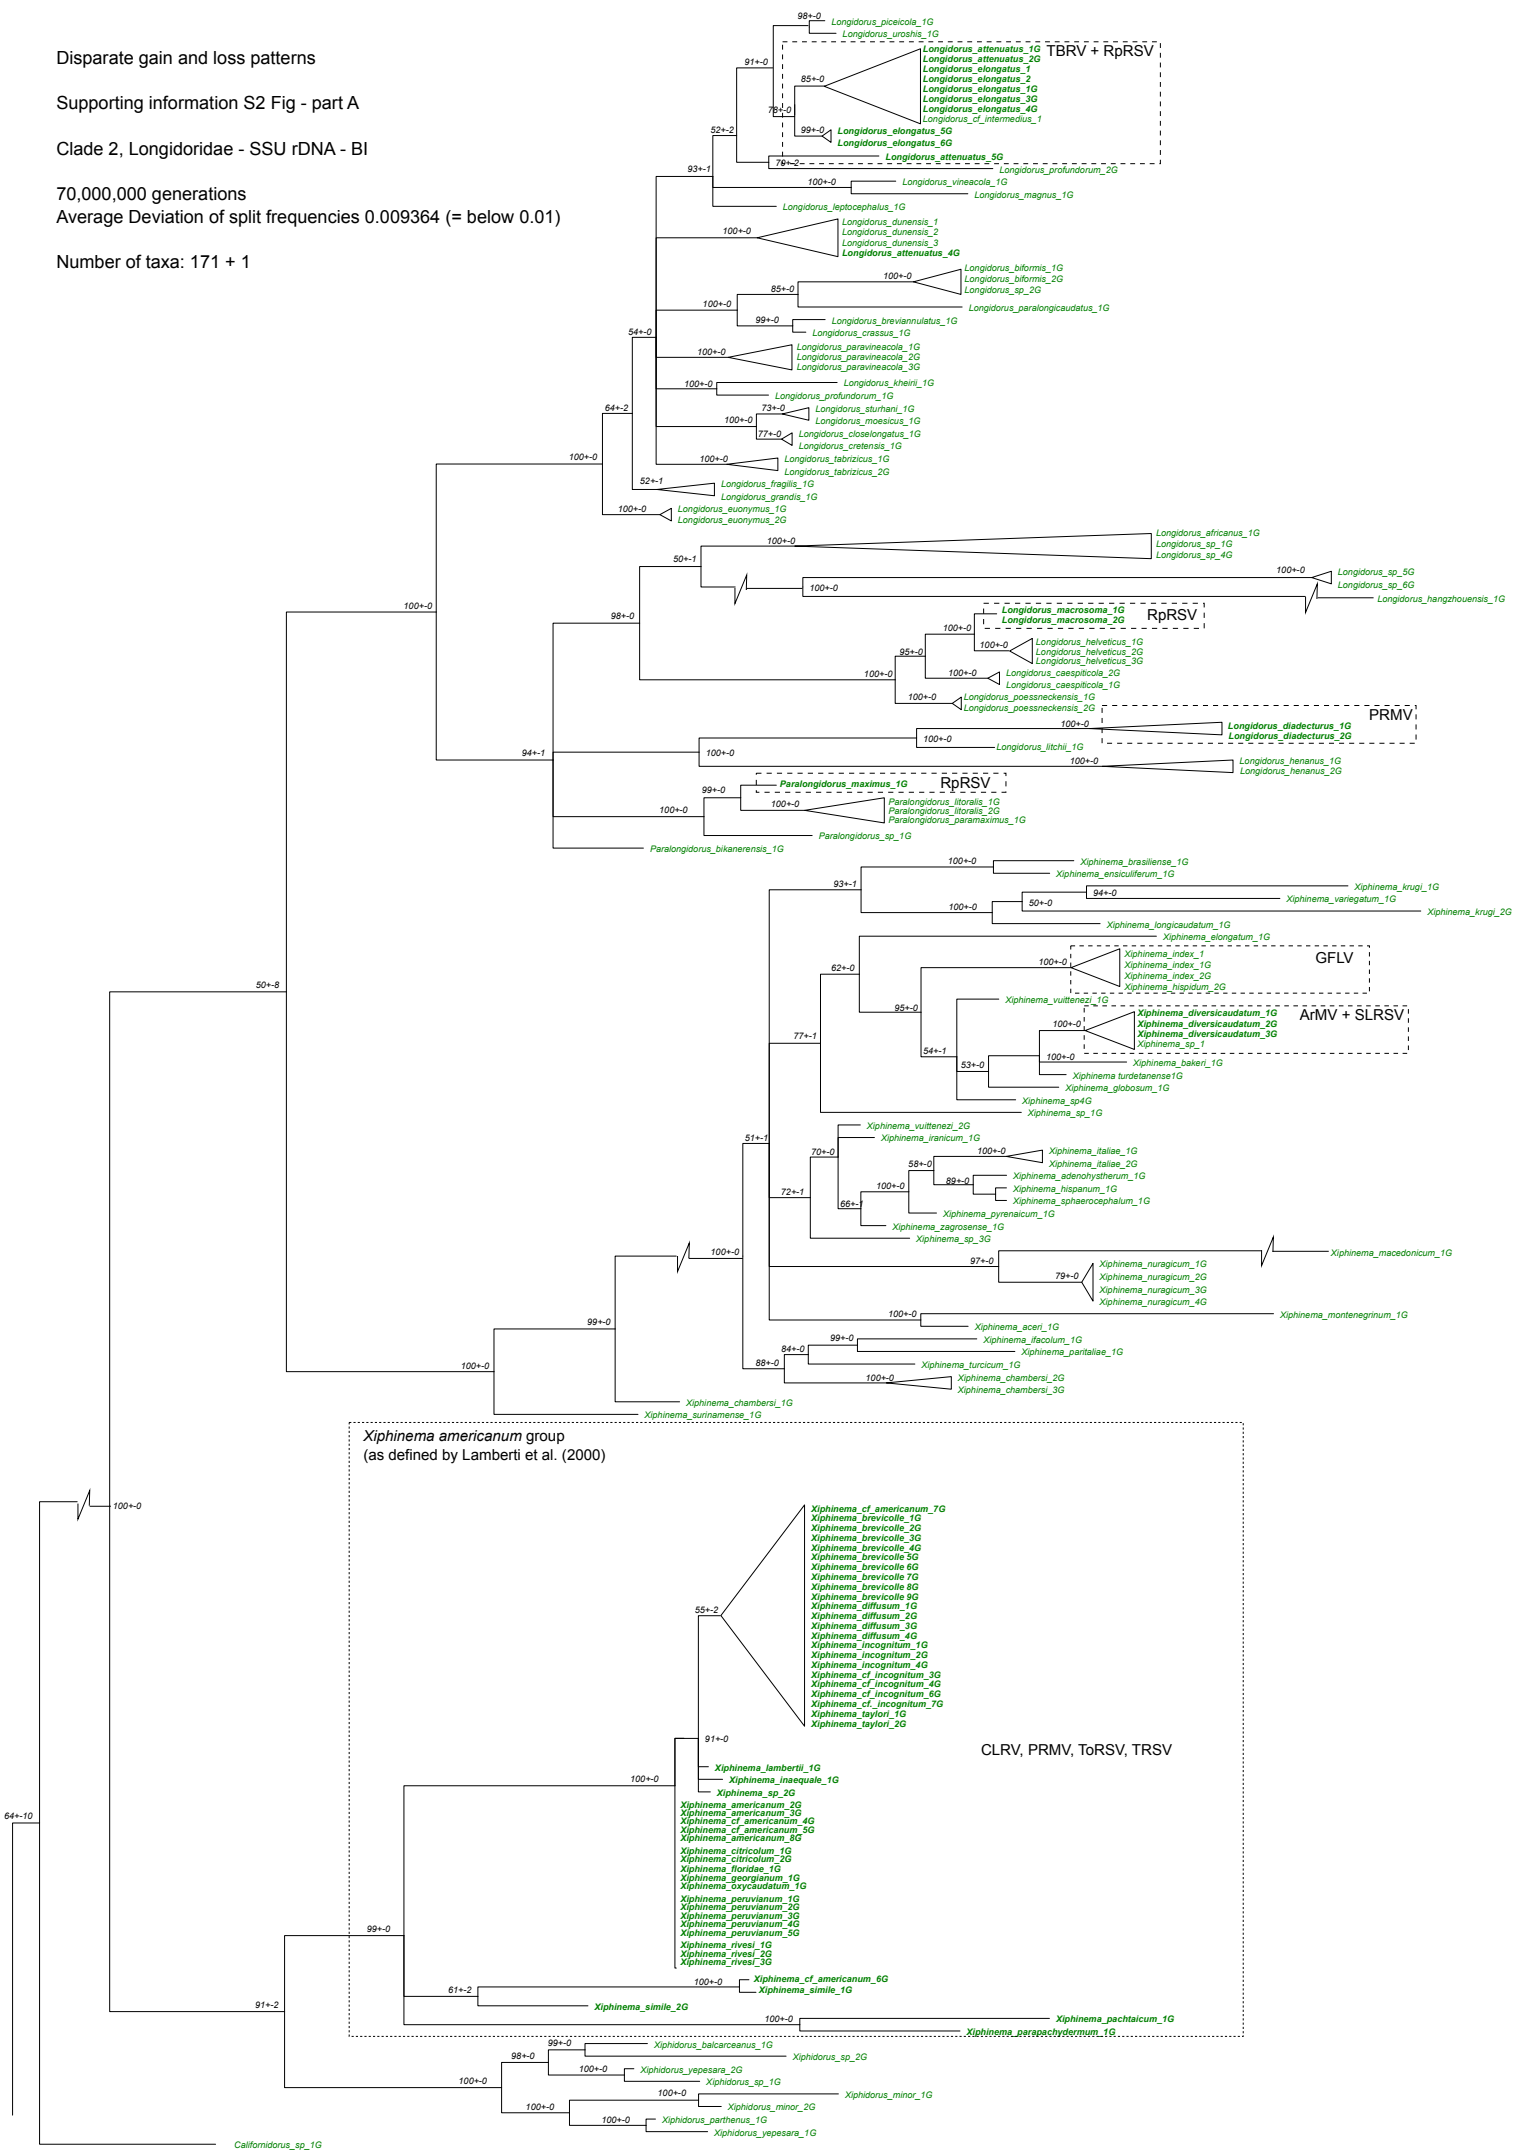

Loop partition: GTR  
Stem partition: S16A

Phylogenetic tree of the family Longidoridae, showing relationships between various species and their respective virus groups. The tree is rooted with *Califormidorus\_sp\_1G* and branches out into several major clades. Key clades include *Longidorus*, *Paralongidorus*, *Xiphinema*, and *Xiphidurus*. Virus groups are indicated by dashed boxes and labels: GFLV, ArMV + SLRSV, PRMV, CLRV, PRMV, ToRSV, and TRSV. Bootstrap values are provided for many nodes.

**Longidoridae**

*Longidorus* clade:

- Longidorus\_vinescolae\_1G*
- Longidorus\_magnus\_1G*
- Longidorus\_attenuatus\_5G*
- Longidorus\_attenuatus\_4G*
- Longidorus\_biformis\_1G*
- Longidorus\_biformis\_2G*
- Longidorus\_sp\_3G*
- Longidorus\_parallelcaudatus\_1G*
- Longidorus\_crassus\_1G*
- Longidorus\_brevianulatus\_1G*
- Longidorus\_tabrizicus\_1G*
- Longidorus\_tabrizicus\_2G*
- Longidorus\_sturani\_1G*
- Longidorus\_kheiri\_1G*
- Longidorus\_profundorum\_1G*
- Longidorus\_paravineosole\_1G*
- Longidorus\_paravineosole\_2G*
- Longidorus\_paravineosole\_3G*
- Longidorus\_fragilis\_1G*
- Longidorus\_grandis\_1G*
- Longidorus\_euonymus\_1G*
- Longidorus\_euonymus\_2G*

*Paralongidorus* clade:

- Paralongidorus\_paramaximus\_1G*
- Paralongidorus\_libralli\_2G*
- Paralongidorus\_libralli\_1G*
- Paralongidorus\_maximus\_1G*
- Paralongidorus\_bikanerensis\_1G*
- Longidorus\_sp\_1G*
- Longidorus\_sp\_4G*

*Xiphinema* clade:

- Xiphinema\_index\_1G*
- Xiphinema\_index\_1G*
- Xiphinema\_index\_2G*
- Xiphinema\_hispidum\_2G*
- Xiphinema\_vultenezi\_1G*
- Xiphinema\_bakeri\_1G*
- Xiphinema\_diversicaudatum\_1G*
- Xiphinema\_diversicaudatum\_2G*
- Xiphinema\_diversicaudatum\_3G*
- Xiphinema\_sp\_1*
- Xiphinema\_globosum\_1G*
- Xiphinema\_elongatum\_1G*
- Xiphinema\_brasiliense\_1G*
- Xiphinema\_ensiculliferum\_1G*
- Xiphinema\_longicaudatum\_1G*
- Xiphinema\_krugi\_2G*
- Xiphinema\_variegatum\_1G*
- Xiphinema\_zagrosense\_1G*
- Xiphinema\_italiae\_1G*
- Xiphinema\_italiae\_2G*
- Xiphinema\_syrnaticum\_1G*
- Xiphinema\_sphaerocephalum\_1G*
- Xiphinema\_hispanum\_1G*
- Xiphinema\_adenochytherum\_1G*
- Xiphinema\_ranicum\_1G*
- Xiphinema\_vultenezi\_2G*
- Xiphinema\_sp\_3G*
- Xiphinema\_macedonicum\_1G*
- Xiphinema\_nuragicum\_1G*
- Xiphinema\_nuragicum\_2G*
- Xiphinema\_nuragicum\_3G*
- Xiphinema\_nuragicum\_4G*
- Xiphinema\_montenegrinum\_1G*
- Xiphinema\_aceri\_1G*
- Xiphinema\_turcicum\_1G*
- Xiphinema\_fascolum\_1G*
- Xiphinema\_pataliae\_1G*
- Xiphinema\_chambersi\_2G*
- Xiphinema\_chambersi\_3G*

*Xiphinema americana* group (as defined by Lamberti et al. (2000)):

- Xiphinema\_cf\_americanum\_7G*
- Xiphinema\_brevicollis\_1G*
- Xiphinema\_brevicollis\_2G*
- Xiphinema\_brevicollis\_3G*
- Xiphinema\_brevicollis\_4G*
- Xiphinema\_brevicollis\_5G*
- Xiphinema\_brevicollis\_6G*
- Xiphinema\_brevicollis\_7G*
- Xiphinema\_brevicollis\_8G*
- Xiphinema\_brevicollis\_9G*
- Xiphinema\_diffusum\_1G*
- Xiphinema\_diffusum\_2G*
- Xiphinema\_diffusum\_3G*
- Xiphinema\_diffusum\_4G*
- Xiphinema\_inaequalis\_1G*
- Xiphinema\_incognitum\_1G*
- Xiphinema\_incognitum\_2G*
- Xiphinema\_cf\_incognitum\_3G*
- Xiphinema\_incognitum\_4G*
- Xiphinema\_cf\_incognitum\_5G*
- Xiphinema\_cf\_incognitum\_6G*
- Xiphinema\_cf\_incognitum\_7G*
- Xiphinema\_lamberti\_1G*
- Xiphinema\_taylori\_1G*
- Xiphinema\_taylori\_2G*
- Xiphinema\_sp\_2G*

*Xiphidurus* clade:

- Xiphidurus\_minor\_1G*
- Xiphidurus\_minor\_2G*
- Xiphidurus\_yepesara\_1G*
- Xiphidurus\_panthus\_1G*
- Xiphidurus\_sp\_2G*
- Xiphidurus\_balcaraeanus\_1G*
- Xiphidurus\_yepesara\_2G*
- Xiphidurus\_sp\_1G*

**Califormidorus**

*Califormidorus\_sp\_1G*
