# Supplementary material
Source: publisher figshare collection journal article supplement (https://plos.figshare.com/articles/dataset/_/5431585)

Aphelenchoididae

[illegible]

- feeding on fig inflorescences

©MUSA, 10  
Agriculture

**Seinurinae**

Aphelenchoidinae

**Flourescences**

Not vectored by insects

80-110  
750

natidae

\_\_\_\_\_ Turbidity<sub>max</sub> at 1.00

**References**

**Panagrolaimidae**

0.93



Aphelenchoididae

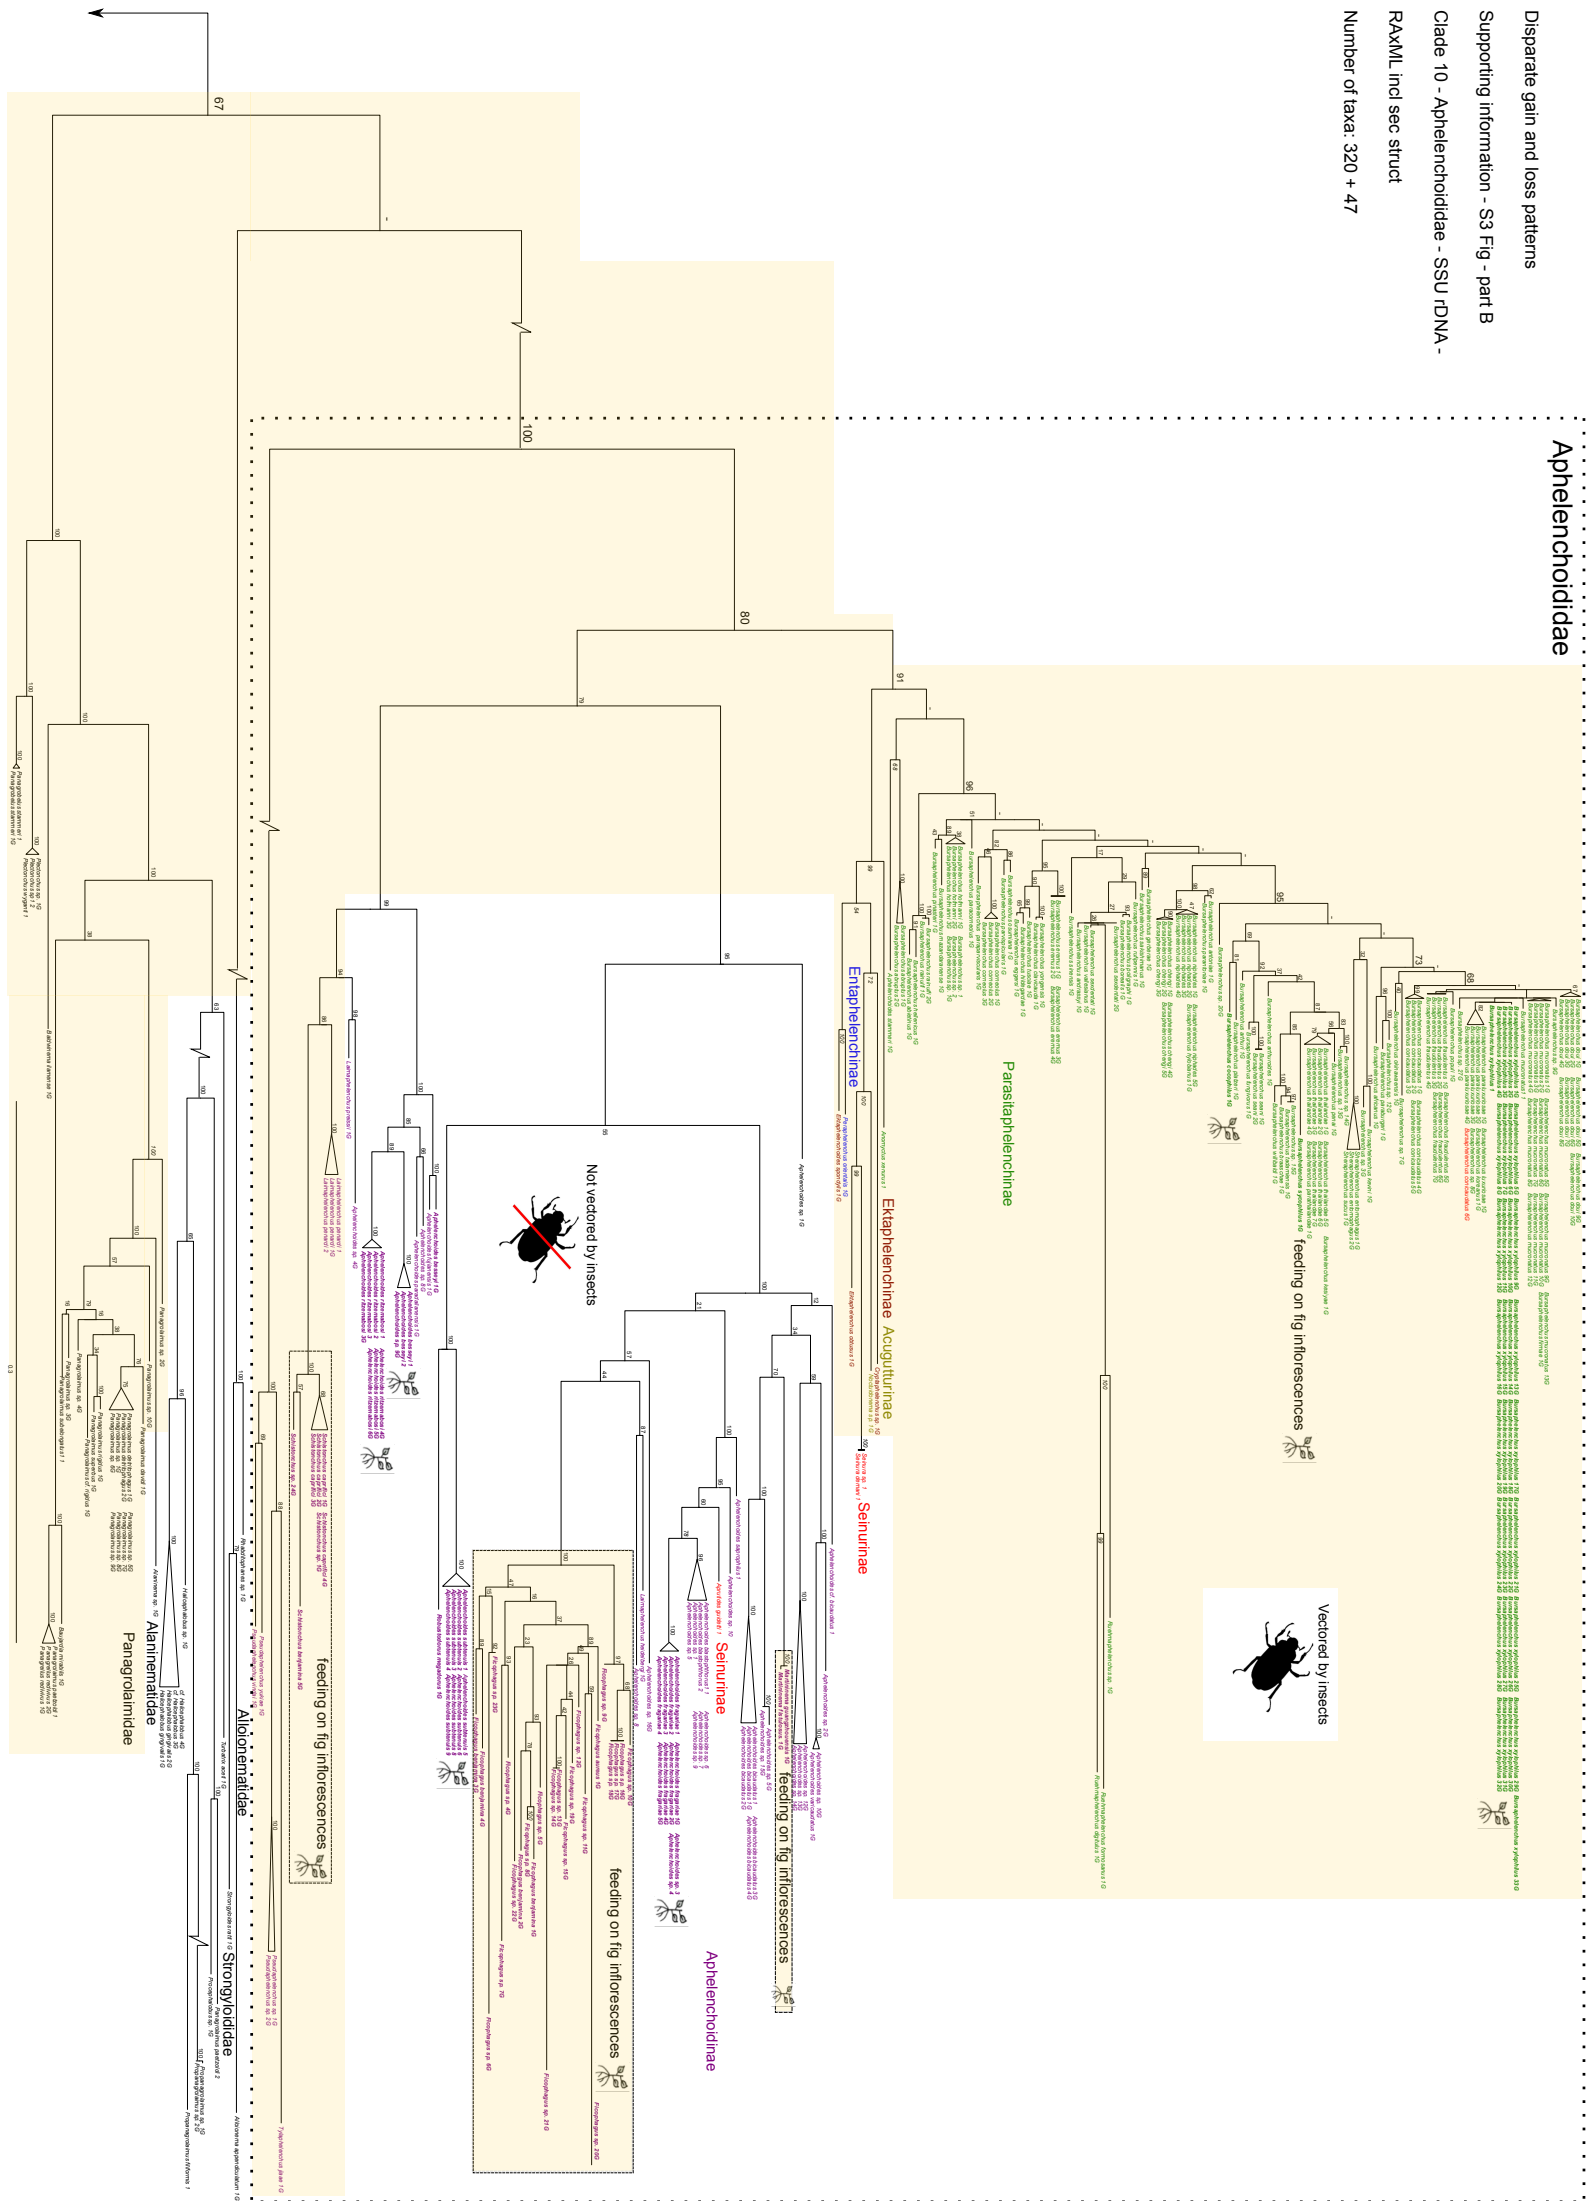

Supplement: Supplementary file [file 1]
