# Supplementary material
Source: publisher figshare collection journal article supplement (https://plos.figshare.com/articles/dataset/_/5431585)
Supplement: Supplementary file [file 1]

**Disparate gain and loss of parasitic abilities among nematode lineages**

Supporting information S1 Fig

Clade 1, Trichodoridae - SSU rDNA - RAXML & BI

Loop partition, model: GTR  
Stem Partition, model: sixteen state model A ("S16A")

Number of taxa: 93 + 13

Phylogenetic tree showing relationships among nematode species, primarily Trichodoridae, based on SSU rDNA data. The tree is rooted at the bottom left and branches out to the right. Major clades are highlighted with dashed boxes and labels: Trichodoridae (green), Diphtherophoridae (blue), Odontolaimidae (red), and Onchuridae (black). Species names are listed next to their respective branches, often with a number indicating a specific lineage (e.g., 1G, 2G, 3G, 4G, 5G, 6G, 7G, 8G, 9G). Bootstrap values are shown at the nodes. The tree illustrates the gain and loss of parasitic abilities across different nematode lineages.

Key species and lineages shown include:

- Trichodorus* spp. (e.g., *Trichodorus viruliferus*, *Trichodorus primitivus*, *Trichodorus similis*, *Trichodorus sparsus*, *Trichodorus pakistanensis*, *Trichodorus lusitanicus*, *Trichodorus sp.*, *Trichodorus variopapillatus*)
- Paratrichodorus* spp. (e.g., *Paratrichodorus teres*, *Paratrichodorus allius*, *Paratrichodorus hispanus*, *Paratrichodorus pachydermus*, *Paratrichodorus macrostylus*, *Paratrichodorus divergens*, *Paratrichodorus sp.*, *Paratrichodorus anemones*)
- Diphtherophora* spp. (e.g., *Diphtherophora communis*, *Diphtherophora obesa*)
- Odontolaimus* spp. (e.g., *Odontolaimus sp.*, *Odontolaimus chiorurus*)
- Stenonchulus troglodytes*

Supporting information S1 Fig

Clade 1, Trichodoridae - SSU rDNA - RAXML & BI

Loop partition, model: GTR  
Stem Partition, model: sixteen state model A ("S16A")

Number of taxa: 93 + 13
